# Supplementary material for: Influence of Foliar Treatment with Suspensions Rich in Trichoderma Chlamydospores on Momordica charantia Physiology, Yield, and Quality
Source: MDPI journal article supplement (doi:10.3390/horticulturae10040371), 2024-04-07
Supplement: s1 [file s1]

## Supplementary materials

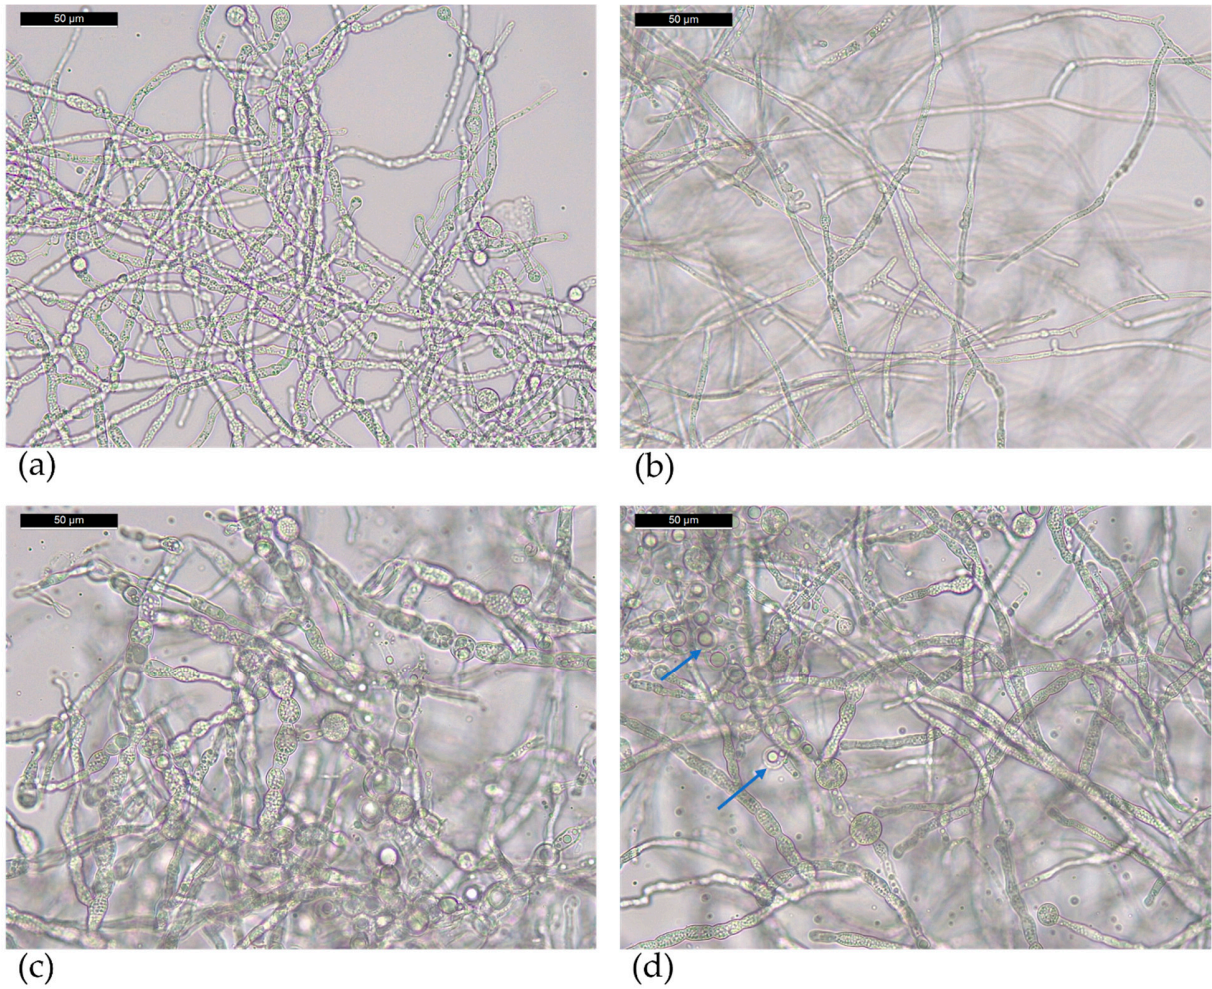

**Figure S1.** Optical microscopical images of *T. asperellum* T36 NCAIM F 001434 grown in PDB (a, b) and cornmeal medium (c, d). The blue arrows indicate the presence of vacuoles/droplets inside hyphae.

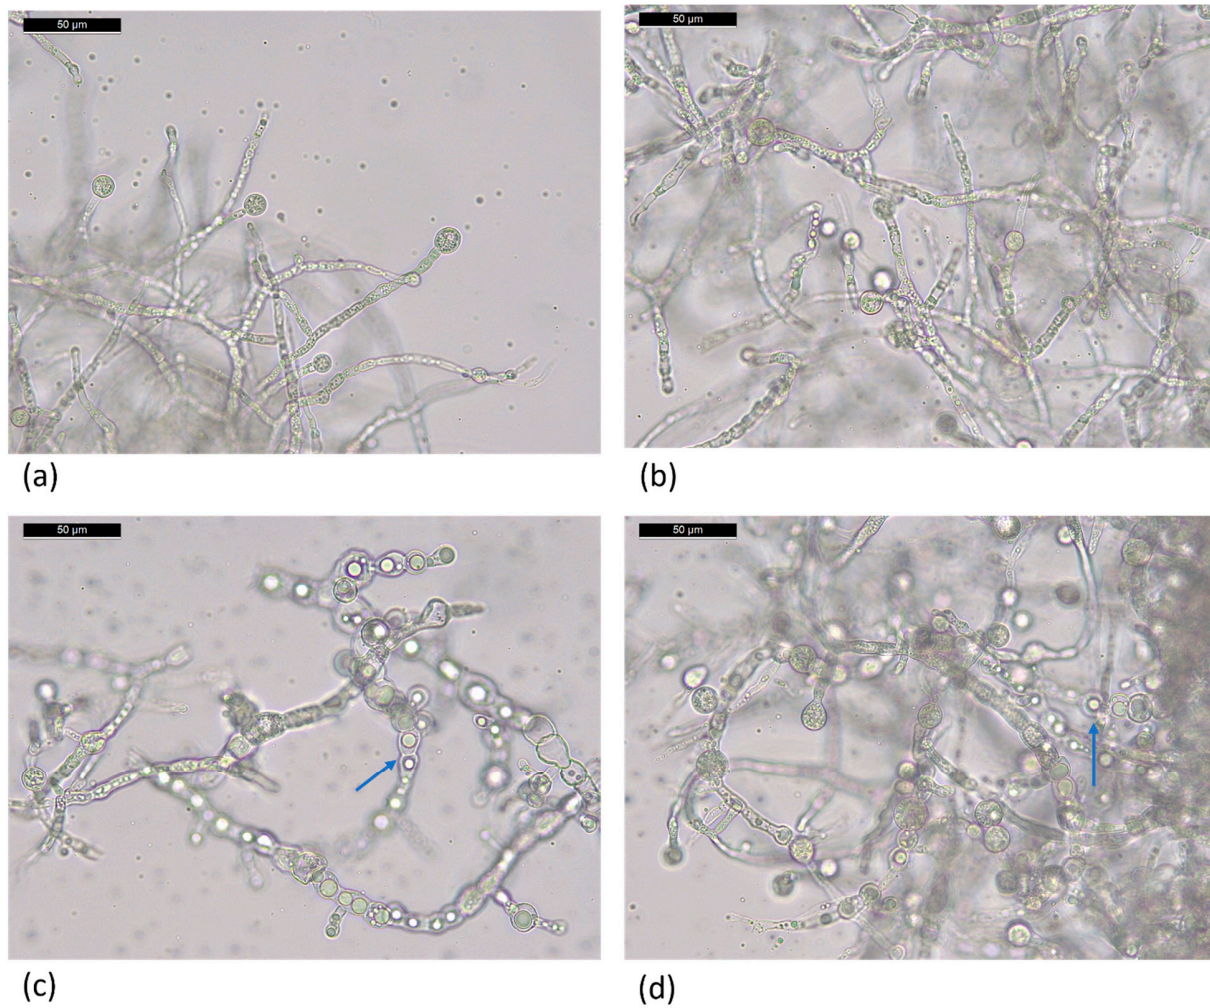

**Figure S2.** Optical microscopical images of *T. harzianum*, Td50b, NCAIM F001412 grown in PDB (a, b) and cornmeal medium (c, d). The blue arrows indicate the presence of vacuoles/droplets inside hyphae.



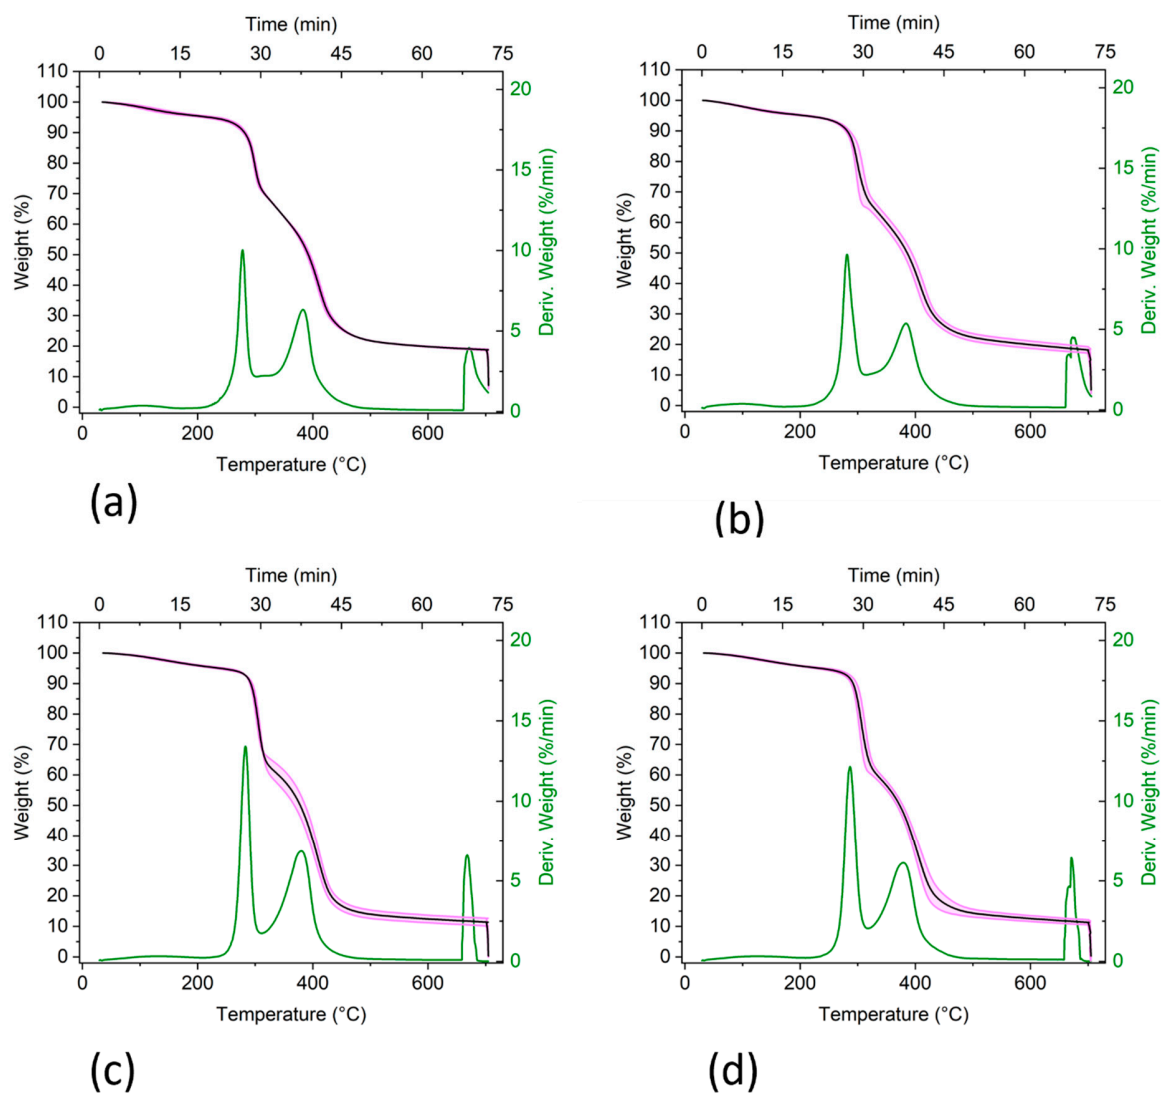

**Figure S3.** Thermogravimetric analysis of *T. asperellum* T36 NCAIM F 001434 (a, c) and *T. harzianum*, Td50b, NCAIM F001412 (b, d) grown in PDB (a, b) and cornmeal medium (c, d). The weight (%) is shown with the error bar limits (light magenta).
